# Supplementary material
Source: PubMed Central journal article supplement (PMC9088072)
Supplement: 12909_2022_3434_MOESM2_ESM.pdf [file 12909_2022_3434_MOESM2_ESM.pdf]

# CTGH Post-Course Survey

Participant ID \_\_\_\_\_

Please indicate your primary institution:

- Harvard Medical School  
 Harvard School of Dental Medicine  
 Harvard T.H. Chan School of Public Health  
 Harvard Divinity School  
 Harvard-affiliated resident  
 Harvard-affiliated fellow  
 Other (specify)

Other institution: \_\_\_\_\_

Please indicate your current year of training within your current training program:

- 1  
 2  
 3  
 4  
 5  
 6 or higher

PRIOR to the course, how likely was global health to be a significant component of your career?

Very unlikely      Uncertain/Neutral      Very likely

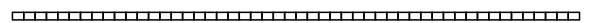

(Place a mark on the scale above)

AFTER the course, how likely is global health to be a significant component of your career?

Very unlikely      Uncertain/Neutral      Very likely

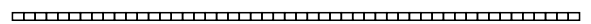

(Place a mark on the scale above)

## Which of the teaching methods used in the course were effective?

|                          | Not at all effective  | Slightly effective    | Very effective        |
|--------------------------|-----------------------|-----------------------|-----------------------|
| Polls                    | <input type="radio"/> | <input type="radio"/> | <input type="radio"/> |
| Breakout room            | <input type="radio"/> | <input type="radio"/> | <input type="radio"/> |
| Practical skill sessions | <input type="radio"/> | <input type="radio"/> | <input type="radio"/> |
| Guest speakers           | <input type="radio"/> | <input type="radio"/> | <input type="radio"/> |
| Case studies             | <input type="radio"/> | <input type="radio"/> | <input type="radio"/> |

What has this course done especially well? \_\_\_\_\_

What are some of the weaknesses in this course? Do you have any suggestions for ways we can make the course better or more helpful to you? \_\_\_\_\_

What do you consider are the advantages and disadvantages of holding this course on a video-conferencing platform? \_\_\_\_\_

Once in-person learning is possible again, which teaching method would you recommend for this course?

- Return to in-person learning on the Harvard Medical School campus  Continue to offer this course on a video-conferencing platform  Use a combination of in-person and video-conferencing sessions

**Please indicate your level of agreement with the following statements:**

|                                                                                              | Strongly disagree     | Slightly disagree     | Neutral/<br>ambivalent | Slightly agree        | Strongly agree        |
|----------------------------------------------------------------------------------------------|-----------------------|-----------------------|------------------------|-----------------------|-----------------------|
| The course was well organized.                                                               | <input type="radio"/> | <input type="radio"/> | <input type="radio"/>  | <input type="radio"/> | <input type="radio"/> |
| This course has prepared me to work more effectively in resource-limited settings.           | <input type="radio"/> | <input type="radio"/> | <input type="radio"/>  | <input type="radio"/> | <input type="radio"/> |
| The course content is appropriate for my level of training and experience.                   | <input type="radio"/> | <input type="radio"/> | <input type="radio"/>  | <input type="radio"/> | <input type="radio"/> |
| I would recommend this course to my classmates and colleagues.                               | <input type="radio"/> | <input type="radio"/> | <input type="radio"/>  | <input type="radio"/> | <input type="radio"/> |
| The guest lecturers were well prepared and knowledgeable.                                    | <input type="radio"/> | <input type="radio"/> | <input type="radio"/>  | <input type="radio"/> | <input type="radio"/> |
| The practical skill sessions helped clarify the instruction.                                 | <input type="radio"/> | <input type="radio"/> | <input type="radio"/>  | <input type="radio"/> | <input type="radio"/> |
| A video-conferencing platform was an effective way to learn global health knowledge .        | <input type="radio"/> | <input type="radio"/> | <input type="radio"/>  | <input type="radio"/> | <input type="radio"/> |
| A video-conferencing platform was an effective way to learn global health practical skills . | <input type="radio"/> | <input type="radio"/> | <input type="radio"/>  | <input type="radio"/> | <input type="radio"/> |

**Please indicate whether you agree that the session was useful in preparing you to work effectively in resource-limited settings:**

|                                                                                           | Strongly disagree     | Slightly disagree     | Neutral/<br>ambivalent | Slightly agree        | Strongly agree        | Did not attend session |
|-------------------------------------------------------------------------------------------|-----------------------|-----------------------|------------------------|-----------------------|-----------------------|------------------------|
| Session 1 (Tue, 2/2):<br>Introduction to global health (Nelson)                           | <input type="radio"/> | <input type="radio"/> | <input type="radio"/>  | <input type="radio"/> | <input type="radio"/> | <input type="radio"/>  |
| Session 1 (Tue, 2/2):<br>Introduction to international child health (Nelson)              | <input type="radio"/> | <input type="radio"/> | <input type="radio"/>  | <input type="radio"/> | <input type="radio"/> | <input type="radio"/>  |
| Session 1 (Tue, 2/2): Global health disparities and non-communicable diseases (Moschovis) | <input type="radio"/> | <input type="radio"/> | <input type="radio"/>  | <input type="radio"/> | <input type="radio"/> | <input type="radio"/>  |

|                                                                                   |                       |                       |                       |                       |                       |                       |
|-----------------------------------------------------------------------------------|-----------------------|-----------------------|-----------------------|-----------------------|-----------------------|-----------------------|
| Session 2 (Thur, 2/4): Diarrheal illnesses (Weil)                                 | <input type="radio"/> | <input type="radio"/> | <input type="radio"/> | <input type="radio"/> | <input type="radio"/> | <input type="radio"/> |
| Session 2 (Thur, 2/4): Rehydration and ORS (Nelson)                               | <input type="radio"/> | <input type="radio"/> | <input type="radio"/> | <input type="radio"/> | <input type="radio"/> | <input type="radio"/> |
| Session 2 (Thur, 2/4): Practical skills session - Make your own ORS (Nelson)      | <input type="radio"/> | <input type="radio"/> | <input type="radio"/> | <input type="radio"/> | <input type="radio"/> | <input type="radio"/> |
| Session 3 (Tue, 2/9): Health care delivery (Rhatigan)                             | <input type="radio"/> | <input type="radio"/> | <input type="radio"/> | <input type="radio"/> | <input type="radio"/> | <input type="radio"/> |
| Session 3 (Tue, 2/9): Global neurology (Wibecan)                                  | <input type="radio"/> | <input type="radio"/> | <input type="radio"/> | <input type="radio"/> | <input type="radio"/> | <input type="radio"/> |
| Session 3 (Tue, 2/10): Improving post-discharge care (Wiens)                      | <input type="radio"/> | <input type="radio"/> | <input type="radio"/> | <input type="radio"/> | <input type="radio"/> | <input type="radio"/> |
| Session 4 (Tue, 2/16): Malnutrition (Cook)                                        | <input type="radio"/> | <input type="radio"/> | <input type="radio"/> | <input type="radio"/> | <input type="radio"/> | <input type="radio"/> |
| Session 4 (Tue, 2/16): Humanitarian emergencies (Greenough)                       | <input type="radio"/> | <input type="radio"/> | <input type="radio"/> | <input type="radio"/> | <input type="radio"/> | <input type="radio"/> |
| Session 4 (Tue, 2/16): Practical skill session - MUAC (Nelson)                    | <input type="radio"/> | <input type="radio"/> | <input type="radio"/> | <input type="radio"/> | <input type="radio"/> | <input type="radio"/> |
| Session 5 (Thur, 2/18): Maternal health (Boatin)                                  | <input type="radio"/> | <input type="radio"/> | <input type="radio"/> | <input type="radio"/> | <input type="radio"/> | <input type="radio"/> |
| Session 5 (Thur, 2/18): Newborn resuscitation (Nelson)                            | <input type="radio"/> | <input type="radio"/> | <input type="radio"/> | <input type="radio"/> | <input type="radio"/> | <input type="radio"/> |
| Session 5 (Thur, 2/18): Practical skill session - Newborn resuscitation (Nelson)  | <input type="radio"/> | <input type="radio"/> | <input type="radio"/> | <input type="radio"/> | <input type="radio"/> | <input type="radio"/> |
| Session 6 (Tue, 2/23): HIV/AIDS (Powis)                                           | <input type="radio"/> | <input type="radio"/> | <input type="radio"/> | <input type="radio"/> | <input type="radio"/> | <input type="radio"/> |
| Session 6 (Tue, 2/23): Tuberculosis (Carter)                                      | <input type="radio"/> | <input type="radio"/> | <input type="radio"/> | <input type="radio"/> | <input type="radio"/> | <input type="radio"/> |
| Session 7 (Tue, 3/2): Malaria (Wirth)                                             | <input type="radio"/> | <input type="radio"/> | <input type="radio"/> | <input type="radio"/> | <input type="radio"/> | <input type="radio"/> |
| Session 7 (Tue, 3/2): Acute respiratory infections in children (Chisti)           | <input type="radio"/> | <input type="radio"/> | <input type="radio"/> | <input type="radio"/> | <input type="radio"/> | <input type="radio"/> |
| Session 7 (Tue, 3/2): Practical skill session - Water bottle spacer (Moschovis)   | <input type="radio"/> | <input type="radio"/> | <input type="radio"/> | <input type="radio"/> | <input type="radio"/> | <input type="radio"/> |
| Session 8 (Thur, 3/4): Critical care medicine in low-resource settings (Riviello) | <input type="radio"/> | <input type="radio"/> | <input type="radio"/> | <input type="radio"/> | <input type="radio"/> | <input type="radio"/> |

|                                                                                              |                       |                       |                       |                       |                       |                       |
|----------------------------------------------------------------------------------------------|-----------------------|-----------------------|-----------------------|-----------------------|-----------------------|-----------------------|
| Session 8 (Thur, 3/4): Clinical oral health for non-dentists (Swann)                         | <input type="radio"/> | <input type="radio"/> | <input type="radio"/> | <input type="radio"/> | <input type="radio"/> | <input type="radio"/> |
| Session 9 (Tue, 3/9): Essential tropical medicine/neglected tropical diseases (Ryan)         | <input type="radio"/> | <input type="radio"/> | <input type="radio"/> | <input type="radio"/> | <input type="radio"/> | <input type="radio"/> |
| Session 9 (Tue, 3/9): Travel medicine and immigrant health (Harris)                          | <input type="radio"/> | <input type="radio"/> | <input type="radio"/> | <input type="radio"/> | <input type="radio"/> | <input type="radio"/> |
| Session 10 (Thur, 3/11): Trends in global health education and training (Nelson)             | <input type="radio"/> | <input type="radio"/> | <input type="radio"/> | <input type="radio"/> | <input type="radio"/> | <input type="radio"/> |
| Session 10 (Thur, 3/11): Faculty career panel discussion: careers in global health (Various) | <input type="radio"/> | <input type="radio"/> | <input type="radio"/> | <input type="radio"/> | <input type="radio"/> | <input type="radio"/> |

---

Any other comments or suggestions?

---
