# Supplementary material
Source: PubMed Central journal article supplement (PMC9088072)
Supplement: 12909_2022_3434_MOESM3_ESM.pdf [file 12909_2022_3434_MOESM3_ESM.pdf]

# CTGH Faculty Survey

We would appreciate feedback on your experience teaching in Clinical Topics in Global Health this year.

Thank you!

Please indicate your primary institutional affiliation:

- Harvard University (Harvard Medical School/Harvard School of Public Health)  
 Other university/medical center in the US  
 Other university/medical center outside the US  
 Other (specify)

Other institution: \_\_\_\_\_

## How helpful were the following teaching methods in delivering your lecture?

|                                                               | Not at all helpful    | Slightly helpful      | Very helpful          | Did not use (N/A)     |
|---------------------------------------------------------------|-----------------------|-----------------------|-----------------------|-----------------------|
| Polls                                                         | <input type="radio"/> | <input type="radio"/> | <input type="radio"/> | <input type="radio"/> |
| Breakout rooms                                                | <input type="radio"/> | <input type="radio"/> | <input type="radio"/> | <input type="radio"/> |
| Chat Q&A                                                      | <input type="radio"/> | <input type="radio"/> | <input type="radio"/> | <input type="radio"/> |
| Verbal questions                                              | <input type="radio"/> | <input type="radio"/> | <input type="radio"/> | <input type="radio"/> |
| Ability to deliver lecture while away from the Harvard campus | <input type="radio"/> | <input type="radio"/> | <input type="radio"/> | <input type="radio"/> |

In your opinion, what are the advantages of teaching via a remote platform (compared to in-person teaching)? \_\_\_\_\_

In your opinion, what are the disadvantages of teaching via a remote platform (compared to in-person teaching)? \_\_\_\_\_

How effective do you think remote teaching is in delivering global health education, compared to in-person teaching?

- Remote teaching is less effective than in-person teaching.     Remote teaching is equally effective as in-person teaching.     Remote teaching is more effective than in-person teaching.

When the course is offered again, would you prefer to teach remotely or in person?

- In-person learning on the Harvard Medical School campus     Continue to offer this course on a video-conferencing platform     Use a combination of in-person and video-conferencing sessions

Any additional comments on your experience teaching in this course? \_\_\_\_\_
